# Supplementary material
Source: MDPI journal article supplement (https://www.mdpi.com/2071-1050/10/2/396)
Supplement: s1 [file s1]

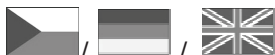

**1 návštěvník/ Besucher / visitor = 1 dotazník / Umfrage / questionnaire**

- **Pohlaví / Geschlecht / Sex:**  
☐ Muž / Männlich / Man ☐ Žena / Weiblich / Woman
- **Věk / Alter / Age:**  
☐ 0-17 ☐ 18-24 ☐ 25-39 ☐ 40-59 ☐ 60+
- **Národnost / Nationalität / Nationality:**  
☐ Česká ☐ Deutsch ☐ Other \_\_\_\_\_
- **Vzdělání / Schulbildung / Education:**  
☐ Základní / Grundschule / elementary school ☐ Střední bez maturity / Mittelschule ohne Abitur / junior high school ☐ Střední s maturitou / mit Abitur / high school ☐ Vysokoškolské / Hochschulbildung / University
- **Bydlím v okrese (nejbližší město) / Wohnort (Landkreis, nächste Stad) / I live in (nearby City):**  
\_\_\_\_\_ (Vypište / Schriftlich nennen / Write down)
- **Cesta k jeskyni z mého bydliště trvá přibližně (hodin) / Die Fahrt zur Höhle von meinem Wohnugsort dauert (Stunden) / This cave is far away from my home (in hours):**  
☐ do/bis/to 0,5 ☐ do/bis/to 1 ☐ do/bis/to 1,5 ☐ do/bis/to 2 ☐ do/bis/to 3 ☐ 3 +
- **K dopravě do blízkosti jeskyně jsem využil / Anreise zur Höhle mit / I got to the cave by:**  
☐ Auto / Car ☐ Autobus / Bus ☐ Vlak / Zug / Train ☐ Jinak / Andere/ Other \_\_\_\_\_
- **O jeskyni jsem se prvně dozvěděl / Über die Höhle habe ich zum ersten mal die Auskünfte bekommen. / For the first time I was informed about cave from:**  
☐ Z literatury (průvodce) / Literatur / guide books  
☐ Od druhé osoby / andere Person / another person  
☐ Z internetu / Internet / Internet  
☐ Jinak / Andere/ Other \_\_\_\_\_
- **Jeskyni jsem navštívil / Besuch der Höhle habe ich besuchen / I visited the cave:**  
☐ s profesionálním průvodcem / mit professionellem Begleiter / with profesional guide  
☐ bez profesionálního průvodce / ohne professionellem Begleiter / without profesional guide
- **Jeskyně v Labských pískovcích navštěvuji / Die Höhle im Elbsandsteingebirge besuche ich / I visited the cave in the Elb Sandstone Mountains:**  
☐ Prvně / zum ersten Mal / Today for the first time  
☐ Občas / manchmal / occasionally (once a year)  
☐ Pravidelně / regelmässig / regularly (several times per year)
- **Nejvíce se věnuji / Mein Hauptinteresse / I'm mostly interested in:**  
☐ Speleologii / Speläologie / speleology  
☐ Lezení / Felsklettern / climbing  
☐ Turistika / Touristik / tourism  
☐ Geocaching  
☐ Jiné sporty a zájmy / Andere Sportarten und Hobbys / Other sports and hobbies
- **K návštěvě jeskyně mě nejvíce motivuje / Grund für den Besuch der Höhle / For visiting I am motivated by:**  
☐ Věda a poznání přírody / Wissenschaft und Naturkenntnisse / Science and knowledge  
☐ Adrenalin a dobrodružství / Adrenalin und Abenteuer / Adrenaline and adventure  
☐ Sportovní vyžití / Sportliche Betätigung / Sport  
☐ Nevím / Ich weiß nicht / I don't know  
☐ Jiná motivace / Andere Grund / Other motivation \_\_\_\_\_
- **Hlavním cílem mého výletu do této oblasti je návštěva jeskyně / Das Hauptziel meines Ausfluges in diesem Gebiet ist ein Besuch der Höhle / Have you come here to visit the cave?:**  
☐ Ano / Ja / Yes ☐ Ne / Nein / No
- **Mám v úmyslu návštěvu zdejších jeskyní zopakovat / Ich habe vor, die Höhlen wieder zu besuchen / I want to visit these caves again:**  
☐ Ano / Ja / Yes ☐ Možná / Möglicherweise / Maybe ☐ Ne / Nein / No
